# Supplementary material for: Dynamic modeling and vibration characteristics analysis of parallel antenna
Source: Copernicus journal article supplement (doi:10.5194/ms-13-1019-2022), 2022-12-19
Supplement: Supplementary file 1 [file ms-13-1019-2022-supplement.zip]

Archive with 13 entries (13 files):
- Figure 10.vsdx
- Figure 8.vsdx
- Figure 4.vsdx
- Figure 1.vsdx
- Figure 11.vsdx
- Figure 7.vsdx
- Figure 12.vsdx
- Figure 2.vsdx
- ms-13-1019-2022-supplement-title-page.pdf
- Figure 6.vsdx
- Figure 3.vsdx
- Figure 5.vsdx
- Figure 9.vsdx
