# Supplementary material for: Dynamic modeling and vibration characteristics analysis of parallel antenna
Source: Copernicus journal article supplement (doi:10.5194/ms-13-1019-2022), 2022-12-19
Supplement: Supplementary file 1 [file ms-13-1019-2022-supplement.zip › ms-13-1019-2022-supplement-title-page.pdf]

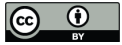

## *Supplement of*

# **Dynamic modeling and vibration characteristics analysis of parallel antenna**

**Guoxing Zhang et al.**

*Correspondence to:* Jinwei Guo (1473733099@qq.com)

- ms-13-1019-2022-supplement-title-page.pdf
- Figure 1.vsd
- Figure 10.vsd
- Figure 11.vsd
- Figure 12.vsd
- Figure 2.vsd
- Figure 3.vsd
- Figure 4.vsd
- Figure 5.vsd
- Figure 6.vsd
- Figure 7.vsd
- Figure 8.vsd
- Figure 9.vsd

The copyright of individual parts of the supplement might differ from the article licence.
